# Supplementary material
Source: ML conference proceedings conference paper supplement (https://openreview.net/forum?id=4xI4oaqIs2)

$(\alpha - s)$  not covered

larger  $s$

coverage of  $\chi$ :  $1 - (\alpha - s)$

coverage of  $\epsilon$ :  $1 - \tilde{\alpha}$

$X$

$0 \leq \|\epsilon\| \leq r$

$X$

input space  $\chi$

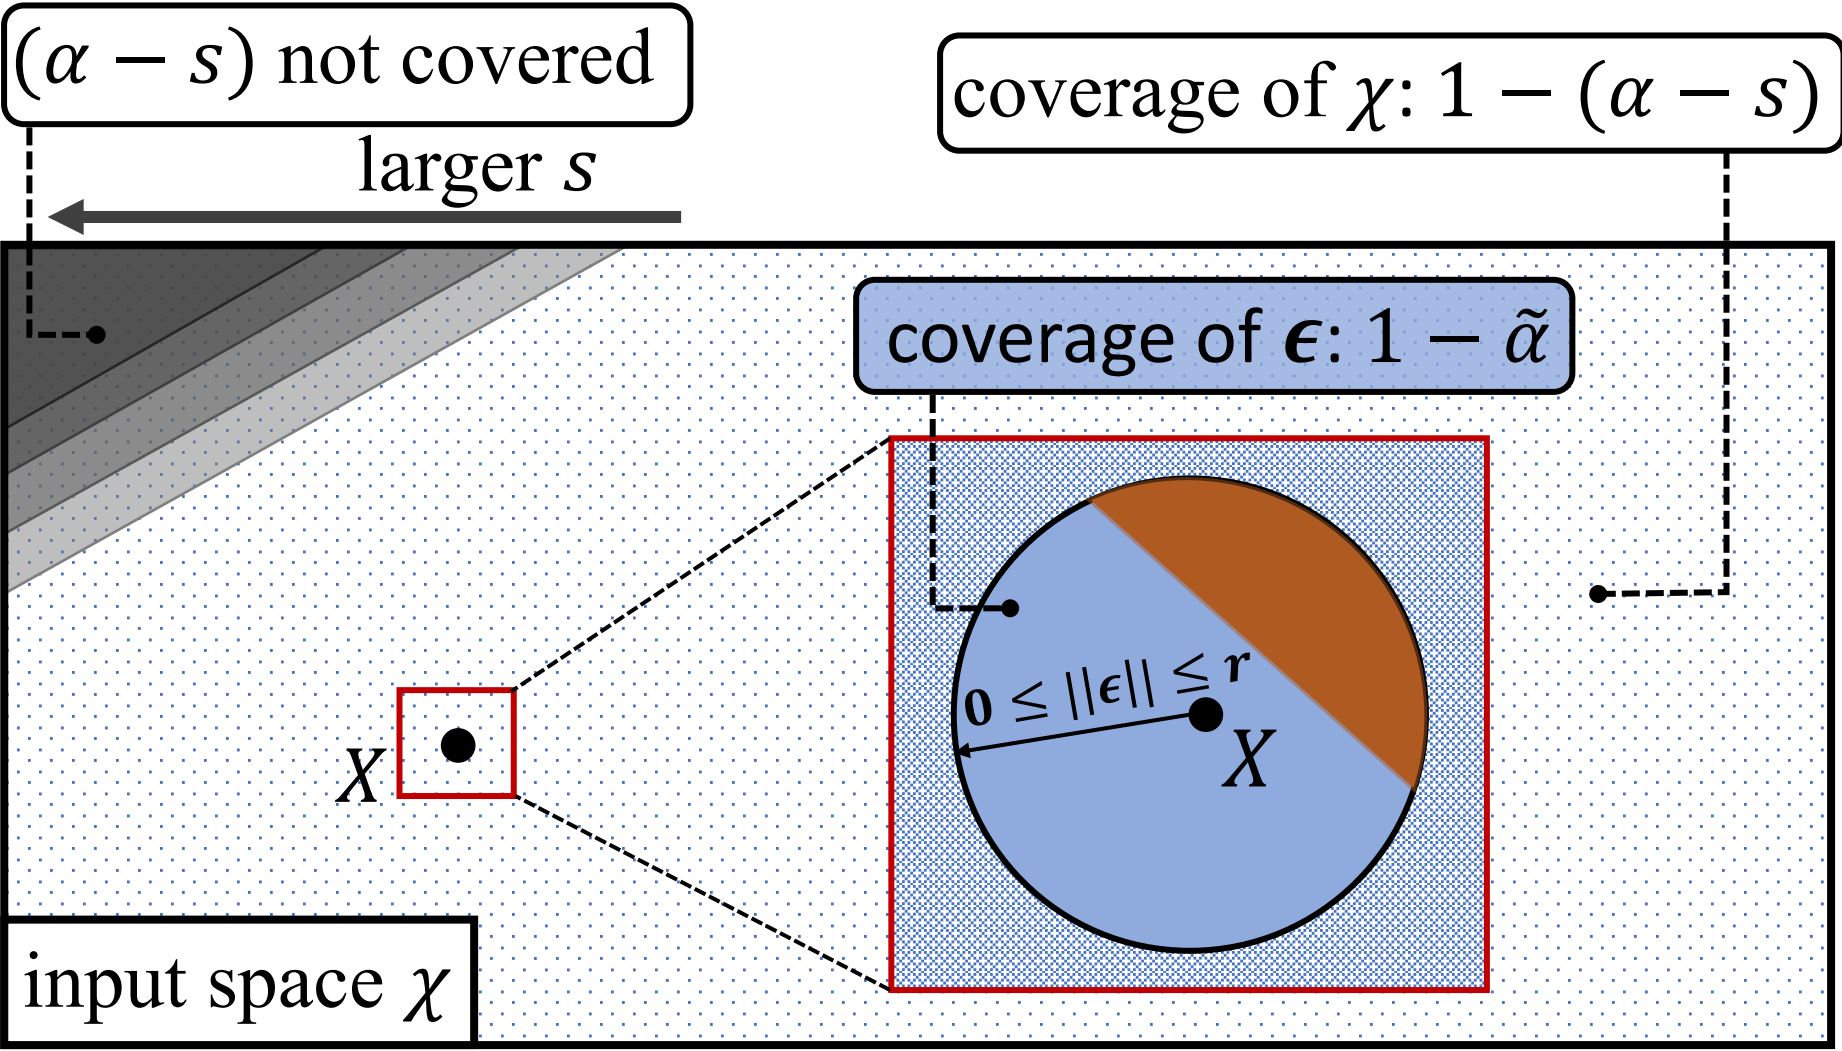

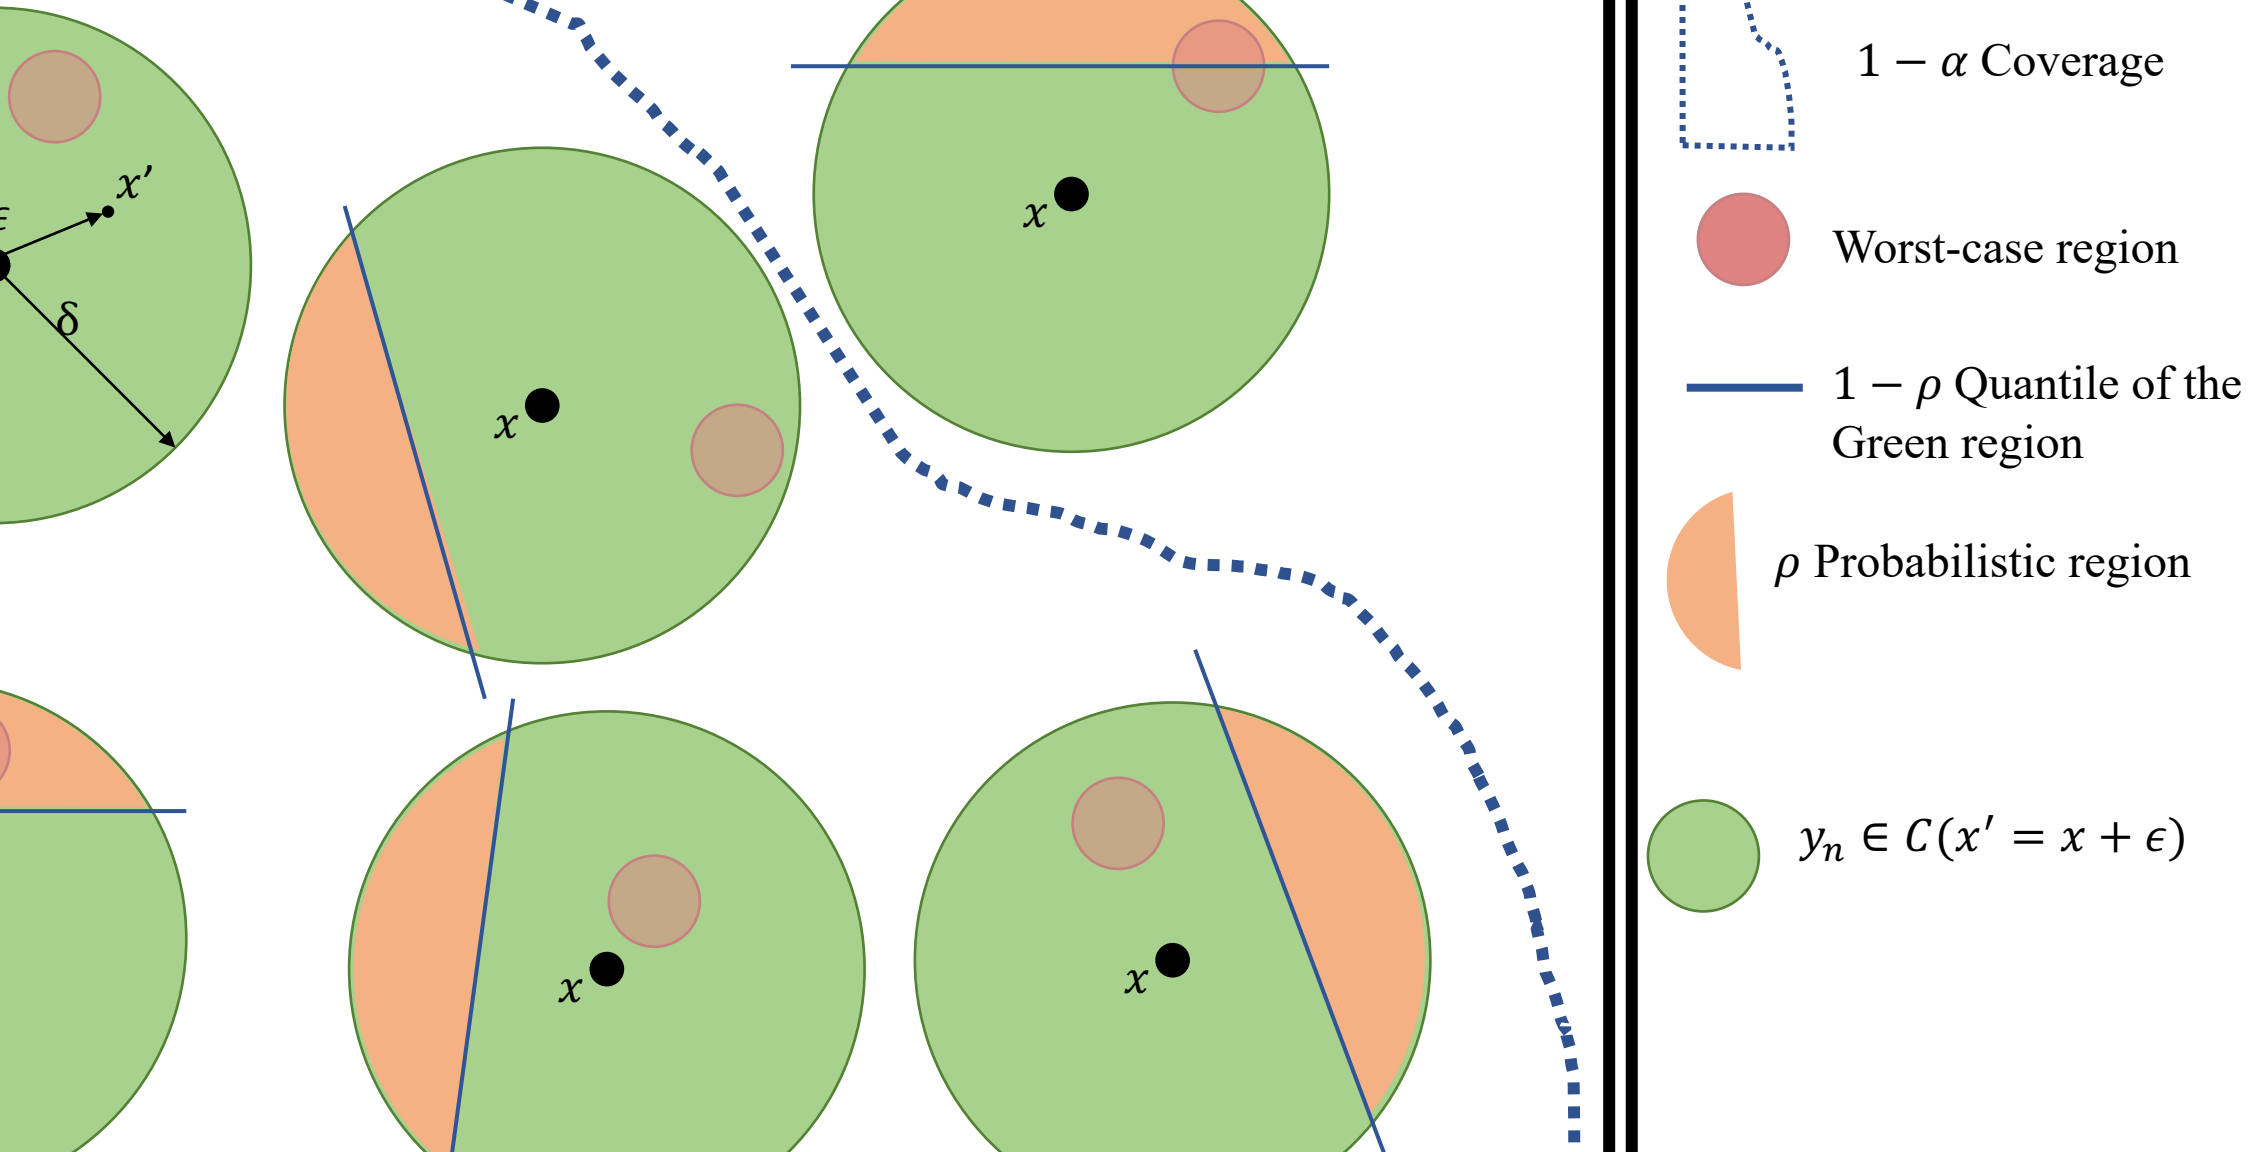

Supplement: supplementary_material [file attachment]
